# Supplementary material for: Enhanced oxygen exchange capacity in nano-structured vanadia–ceria multi-phase oxygen carriers for solar thermal fuel production
Source: Royal Society of Chemistry journal article supplement (doi:10.1039/c9ta06471k), 2019-01-01
Supplement: c9ta06471k1.pdf [file c9ta06471k1.pdf]

**Enhanced oxygen exchange capacity in nano-structured ceria–vanadia multi-phase oxygen carriers for solar thermal fuel production**

Asim Riaz<sup>a</sup>, Muhammad Umair Ali<sup>b</sup>, Wojciech Lipiński<sup>a,\*</sup>, Adrian Lowe<sup>a,\*\*</sup>

<sup>a</sup> Research School of Electrical, Energy and Materials Engineering, The Australian National University, Canberra, ACT 2601, Australia.

<sup>b</sup> Department of Materials Science and Engineering, College of Engineering, Peking University, Beijing 100871, China

\* Corresponding author. *E-mail*: [wojciech.lipinski@anu.edu.au](mailto:wojciech.lipinski@anu.edu.au); *Tel*: +61 2 612 57896

\*\* Corresponding author. *E-mail*: [adrian.lowe@anu.edu.au](mailto:adrian.lowe@anu.edu.au); *Tel*: +61 2 612 54881.

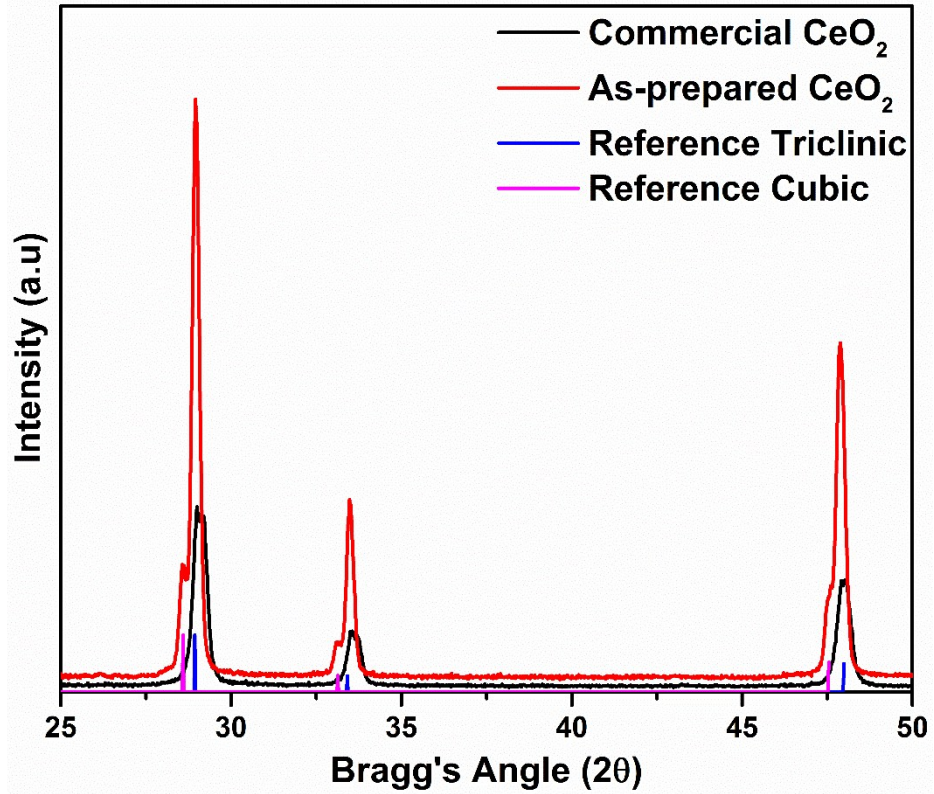

S 1. Structural comparison of different CeO<sub>2</sub> structures: (red) XRD pattern of as-prepared CeO<sub>2</sub> representing a triclinic (COD ID: 96-721-7888) with a low angle shoulder cubic (COD ID: 96-434-3162); (black) XRD pattern of commercial CeO<sub>2</sub> powder purchased from Sigma. Reference patterns are obtained from crystallographic open database (COD).

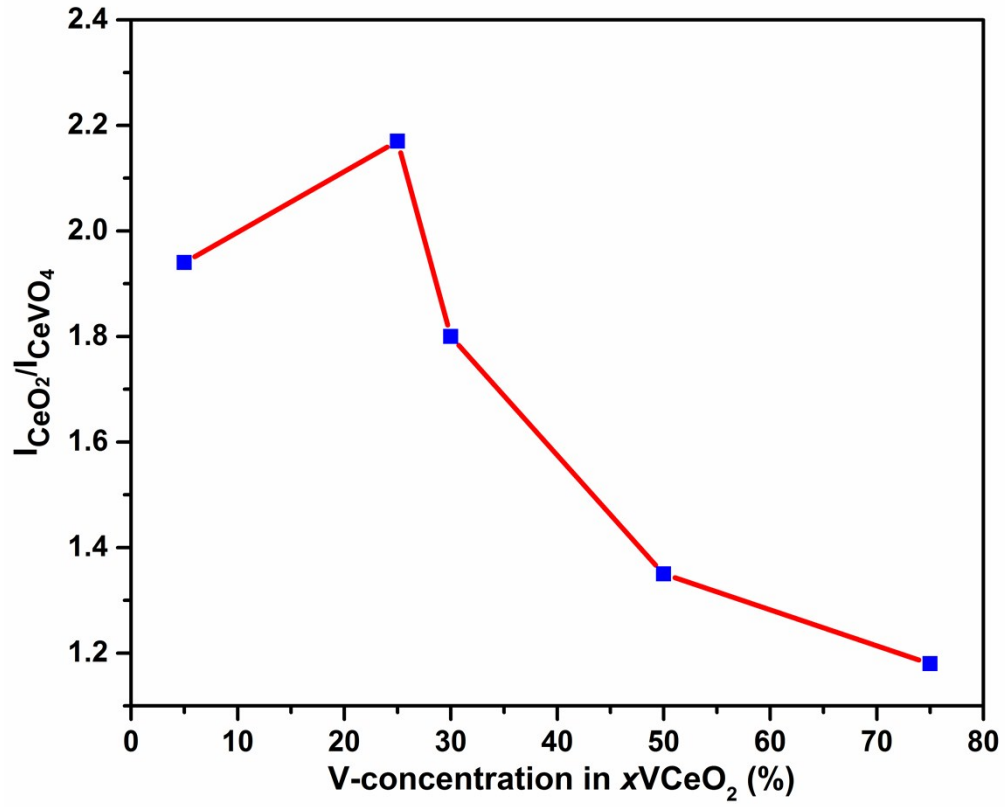

S 2. XRD peak Intensity ratios of  $\text{CeO}_2/\text{CeVO}_4$  representing the phase segregation of  $\text{CeO}_2$  and  $\text{CeVO}_4$  in  $x\text{VCeO}_2$  ( $x=5$ -75%).

### Methane conversion

T 1. Methane conversion ( $X_{CH_4}$ ) by pure ceria and CV25 samples during MPO-CDS, MPO-WS, MPO-WS-CDS and MPO-CDS-WS redox cycles

| Process    | Materials |       |
|------------|-----------|-------|
|            | Ceria     | CV25  |
| MPO-CDS    | 0.1158    | 0.12  |
| MPO-WS     | 0.034     | 0.072 |
| MPO-WS-CDS | 0.059     | 0.09  |
| MPO-CDS-WS | 0.0323    | 0.077 |

Methane conversion was calculated by:

$$X_{CH_4} = \frac{n_{CH_4,IN} - n_{CH_4,OUT}}{n_{CH_4,IN}} \quad (E1)$$

$n_{CH_4,IN}$  and  $n_{CH_4,OUT}$  are the number of moles of Methane going into and out from the reactor

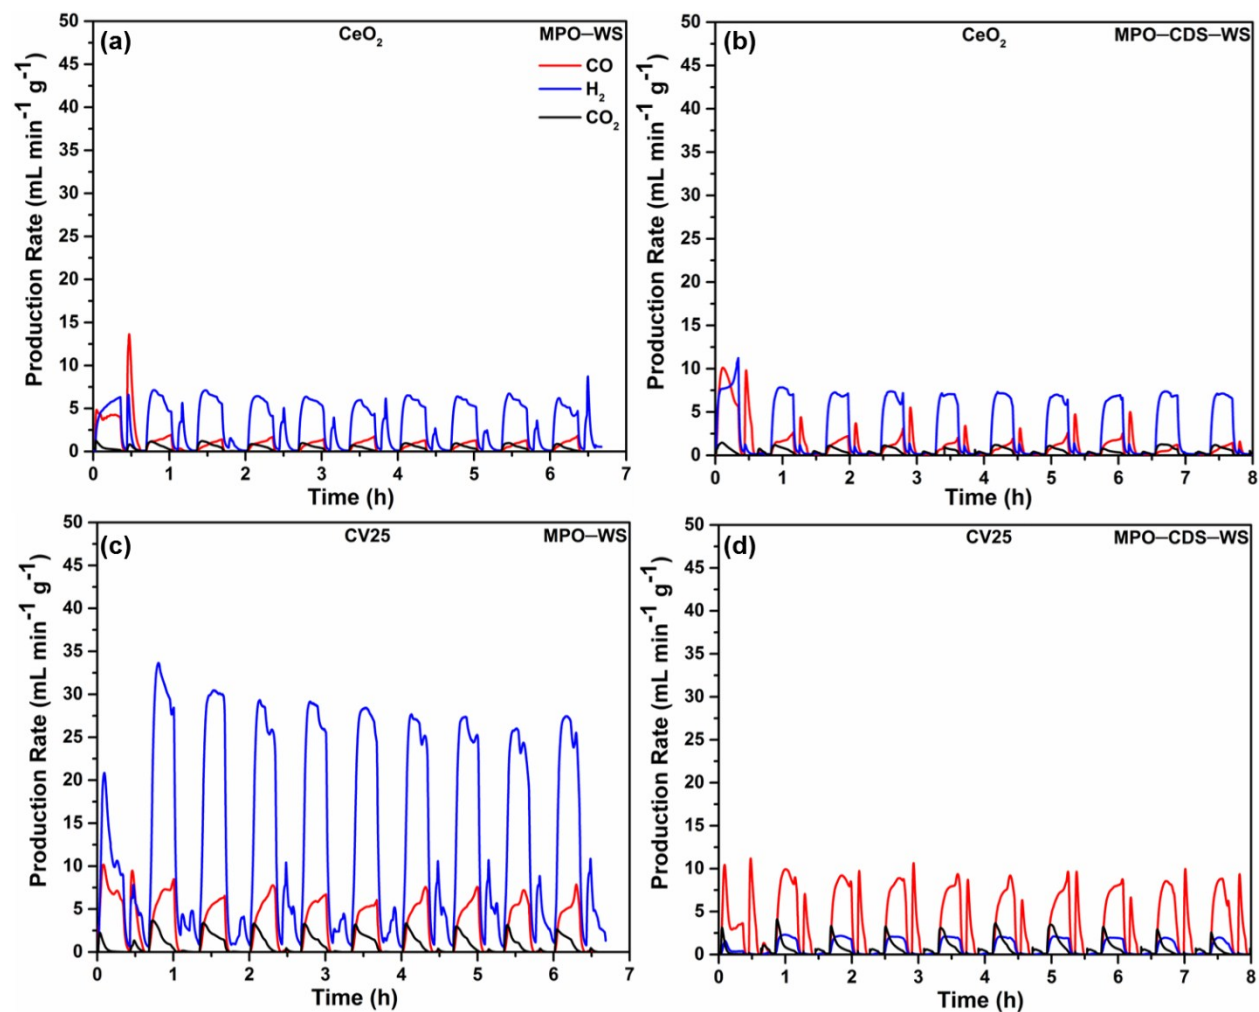

S 3. Production rates of H<sub>2</sub> (blue), CO (red) and CO<sub>2</sub> (black) during: (a) MPO-WS and (b) MPO-CDS-WS on pure nano-structured ceria; (c) MPO-WS and (d) MPO-CDS-WS on CV25. High CO<sub>2</sub> production rates relative to the CO rates are presented in MPO-WS cycles. MPO-CDS-WS represents incomplete oxidation of methane, resulting high H<sub>2</sub> rates.

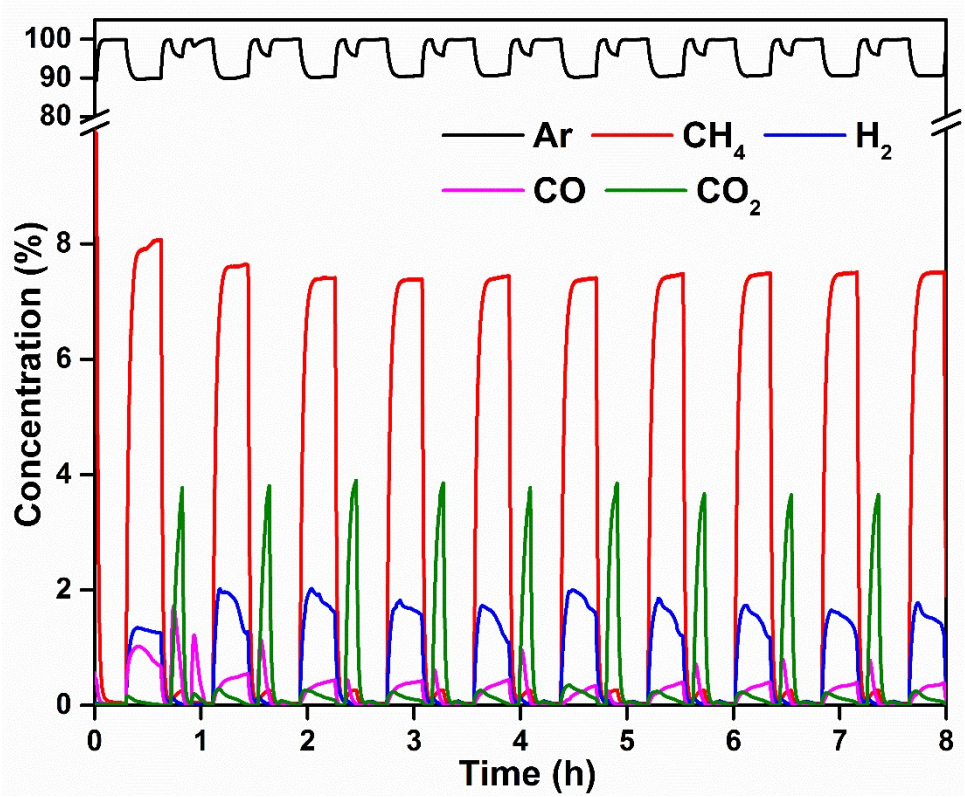

S 4. Real-time reactant and product gas production profiles measured by mass-spectrometer during MPO-WS-CDS redox cycles.

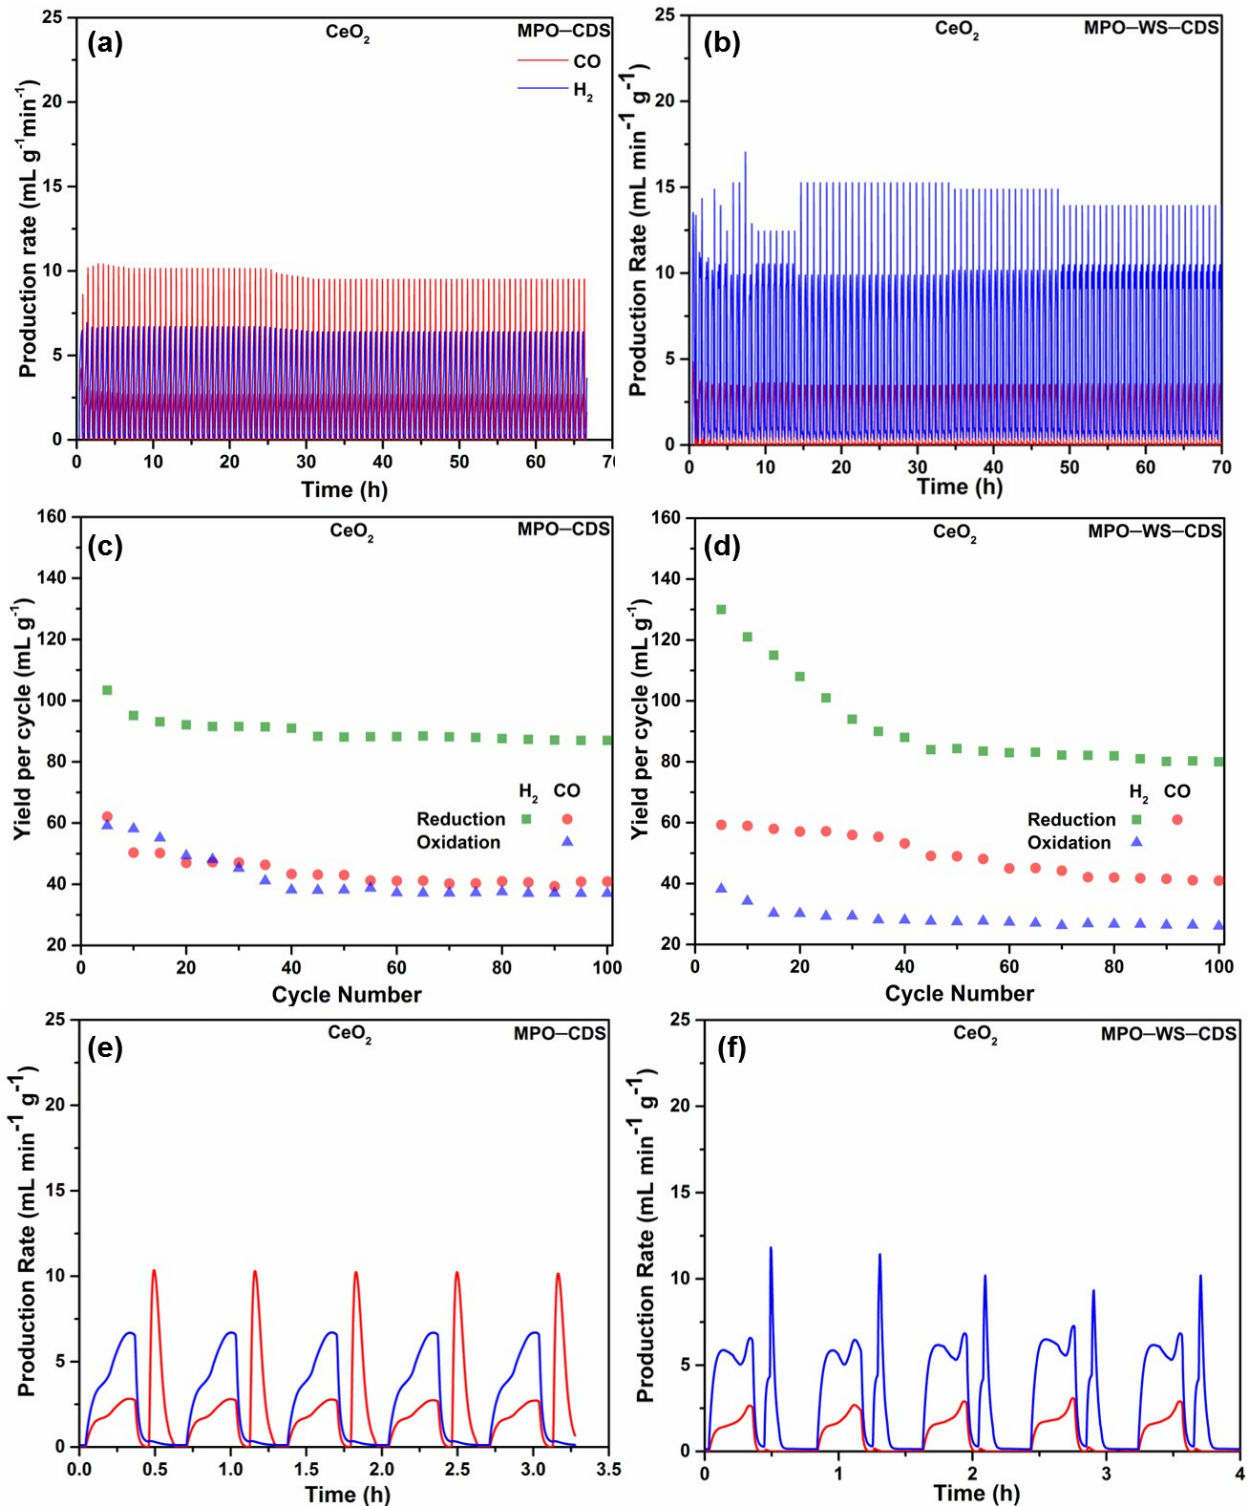

S 5. Thermochemical performance evaluation of nano-ceria during MPO- $\text{CeO}_2$  and MPO-WS- $\text{CeO}_2$  redox cycles: (a) and (b)  $\text{H}_2$  and  $\text{CO}$  production rates; (c) and (d) average yield per 5 cycles; (e) and (f) 5 post 100 cycles.

**Table T2. Performance evaluation of pure ceria and CV25 samples in terms of H<sub>2</sub>/CO ratio, CO selectivity and fuel yield during oxidation and reduction steps of MPO–CDS and MPO–WS cycles.**

| Material               | Cycle (#) | MPO–CDS                                      |                                  |         |                    |                                  | MPO–WS                                       |                                  |         |                    |                                              |
|------------------------|-----------|----------------------------------------------|----------------------------------|---------|--------------------|----------------------------------|----------------------------------------------|----------------------------------|---------|--------------------|----------------------------------------------|
|                        |           | Reduction                                    |                                  |         | Oxidation          |                                  | Reduction                                    |                                  |         | Oxidation          |                                              |
|                        |           | H <sub>2</sub> yield (mL g <sup>-1</sup> Mo) | CO yield (mL g <sup>-1</sup> Mo) | SCO (%) | H <sub>2</sub> /CO | CO yield (mL g <sup>-1</sup> Mo) | H <sub>2</sub> yield (mL g <sup>-1</sup> Mo) | CO yield (mL g <sup>-1</sup> Mo) | SCO (%) | H <sub>2</sub> /CO | H <sub>2</sub> yield (mL g <sup>-1</sup> Mo) |
| <b>CeO<sub>2</sub></b> | 2         | 78.27                                        | 39.12                            | 66.52   | 2.01               | 42.47                            | 107.1                                        | 26.11                            | 89.59   | 4.1                | 21.62                                        |
|                        | 4         | 68.4                                         | 37.4                             | 59.06   | 1.83               | 43.2                             | 93.8                                         | 19.1                             | 87.1    | 4.92               | 20.1                                         |
|                        | 6         | 59.9                                         | 33.8                             | 50.55   | 1.77               | 38.8                             | 78.2                                         | 19.9                             | 59.26   | 3.93               | 23.2                                         |
|                        | 8         | 51.58                                        | 29.14                            | 76.8    | 1.78               | 34.49                            | 78.62                                        | 14.52                            | 36.74   | 5.87               | 19.15                                        |
|                        | 10        | 43.9                                         | 26.2                             | 49.6    | 1.73               | 23.7                             | 65.8                                         | 15.7                             | 24.15   | 4.17               | 23.3                                         |
| <b>CV25</b>            | 2         | 157                                          | 94.9                             | 86.03   | 1.95               | 82.6                             | 520                                          | 117                              | 84.96   | 4.46               | 32.4                                         |
|                        | 4         | 128.34                                       | 74.51                            | 85.35   | 2.12               | 65.39                            | 477.92                                       | 112.45                           | 77.92   | 4.25               | 51.522                                       |
|                        | 6         | 120.8                                        | 71.72                            | 78.29   | 2.15               | 56.82                            | 417.57                                       | 132.98                           | 74.5    | 3.14               | 26.45                                        |
|                        | 8         | 114                                          | 65.91                            | 83.75   | 2.22               | 43.75                            | 389.2                                        | 152                              | 67.69   | 2.56               | 67.04                                        |
|                        | 10        | 109.19                                       | 62.39                            | 90.14   | 2.18               | 39.85                            | 344.02                                       | 131.06                           | 63.25   | 2.52               | 71.69                                        |



**Table T3. Performance evaluation of pure ceria and CV25 samples in terms of H<sub>2</sub>/CO ratio, CO selectivity and fuel yield during oxidation and reduction steps of MPO–WS–CDS and MPO–CDS–WS cycles.**

| Material               | Cycle (#) | MPO–WS–CDS                                                   |                                                  |         |                    |                                                              | MPO–CDS–WS                                                   |                                                  |         |                    |                                                  |
|------------------------|-----------|--------------------------------------------------------------|--------------------------------------------------|---------|--------------------|--------------------------------------------------------------|--------------------------------------------------------------|--------------------------------------------------|---------|--------------------|--------------------------------------------------|
|                        |           | Reduction                                                    |                                                  |         | Oxidation          |                                                              | Reduction                                                    |                                                  |         | Oxidation          |                                                  |
|                        |           | H <sub>2</sub> yield<br>(mL g <sup>-1</sup> M <sub>O</sub> ) | CO yield<br>(mL g <sup>-1</sup> M <sub>O</sub> ) | SCO (%) | H <sub>2</sub> /CO | H <sub>2</sub> yield<br>(mL g <sup>-1</sup> M <sub>O</sub> ) | H <sub>2</sub> yield<br>(mL g <sup>-1</sup> M <sub>O</sub> ) | CO yield<br>(mL g <sup>-1</sup> M <sub>O</sub> ) | SCO (%) | H <sub>2</sub> /CO | CO yield<br>(mL g <sup>-1</sup> M <sub>O</sub> ) |
| <b>CeO<sub>2</sub></b> | 2         | 112.27                                                       | 56.01                                            | 88.38   | 2.01               | 50.26                                                        | 131.62                                                       | 32.05                                            | 87.73   | 4.1                | 17.91                                            |
|                        | 4         | 84.8                                                         | 46.42                                            | 88.4    | 1.82               | 16.66                                                        | 112.3                                                        | 22.49                                            | 85.7    | 4.99               | 19.49                                            |
|                        | 6         | 70.34                                                        | 33.13                                            | 88      | 2.23               | 14.23                                                        | 102.5                                                        | 16.27                                            | 71.4    | 6.29               | 9.48                                             |
|                        | 8         | 58.14                                                        | 32.17                                            | 84.95   | 1.75               | 20.36                                                        | 82.82                                                        | 27.54                                            | 42.16   | 3                  | 7.92                                             |
|                        | 10        | 54.68                                                        | 27.6                                             | 84.8    | 1.98               | 29.09                                                        | 79.5                                                         | 13.07                                            | 27.8    | 6.08               | 6.85                                             |
| <b>CV25</b>            | 2         | 171.2                                                        | 65.38                                            | 92.8    | 3.16               | 54.5                                                         | 161.25                                                       | 34.28                                            | 94.2    | 4.7                | 27.41                                            |
|                        | 4         | 153.48                                                       | 54.19                                            | 92.2    | 2.32               | 42.78                                                        | 142.87                                                       | 29.33                                            | 88.49   | 4.87               | 30.35                                            |
|                        | 6         | 138.26                                                       | 51.84                                            | 90.29   | 2.29               | 36.52                                                        | 116.51                                                       | 25.81                                            | 55.1    | 4.38               | 17.7                                             |
|                        | 8         | 125.78                                                       | 48.66                                            | 90.13   | 2.41               | 36.52                                                        | 121.39                                                       | 27.98                                            | 37.43   | 4.45               | 31.14                                            |
|                        | 10        | 109.16                                                       | 46.12                                            | 89.89   | 2.37               | 34.15                                                        | 138.81                                                       | 31.47                                            | 26.3    | 4.41               | 18.72                                            |

Selectivity of CO during the MPO steps were calculated by:

$$S(\text{CO}) = \frac{n(\text{CO})_{\text{MPO}}}{n(\text{CO})_{\text{MPO}} + n(\text{CO}_2)_{\text{MPO}}} \times 100\% \quad (\text{E2})$$

$n(i)_{\text{MPO}}$  denotes the total amount of evolution of species “i” during MPO steps.
